# Supplementary material
Source: publisher site journal article supplement (https://www.spandidos-publications.com/1938/downloadSupplementary)
Supplement: Supplementary file 1 [file downloadSupplementary]

Figure S1. *In vitro* migration of BxPC-3 cells cultured with Panc-1-derived EXOs (magnification, x200). EXO, exosome.

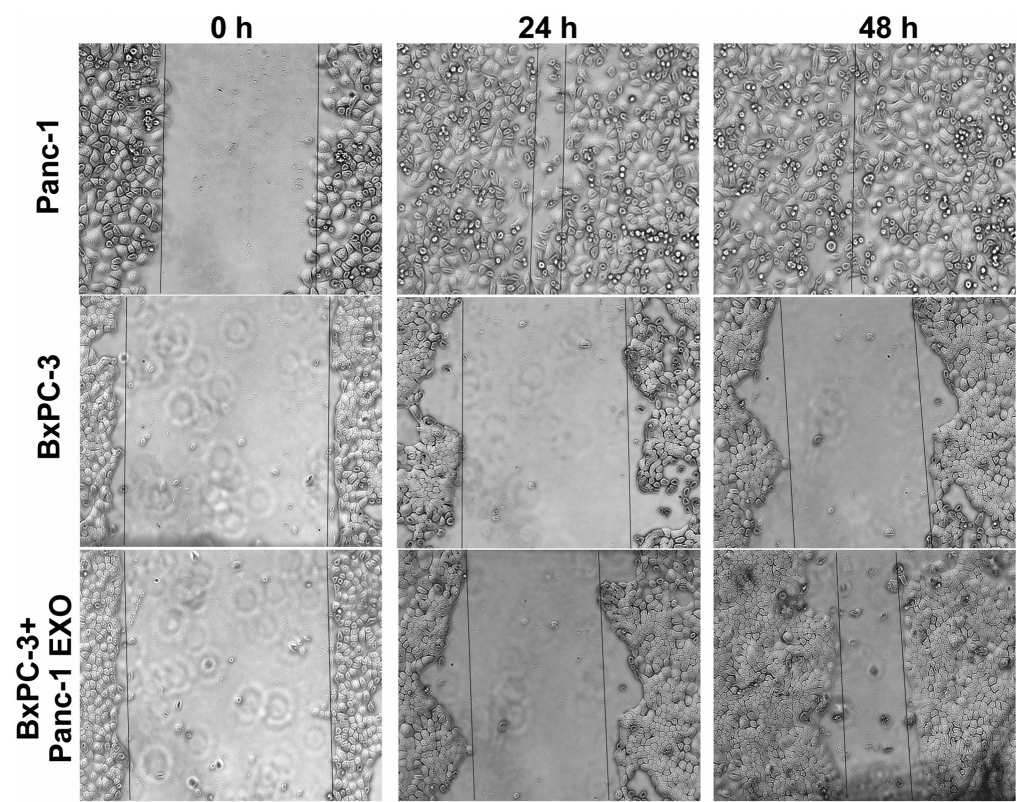

Figure S2. *In vitro* migration of BxPC-3 cells cultured with autologous EXOs. EXO, exosome.

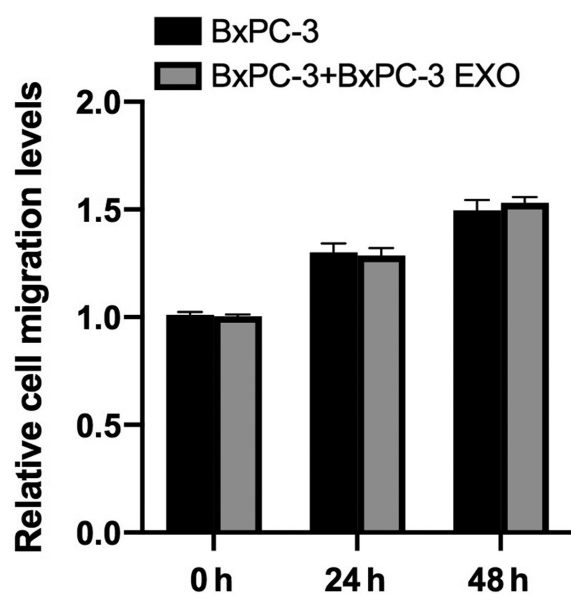

Figure S3. Migration of Panc-1 and Panc1EphA2-cells (magnification, x200). EphA2, receptor tyrosine kinase Eph receptor A2.\*P<0.05 as indicated.

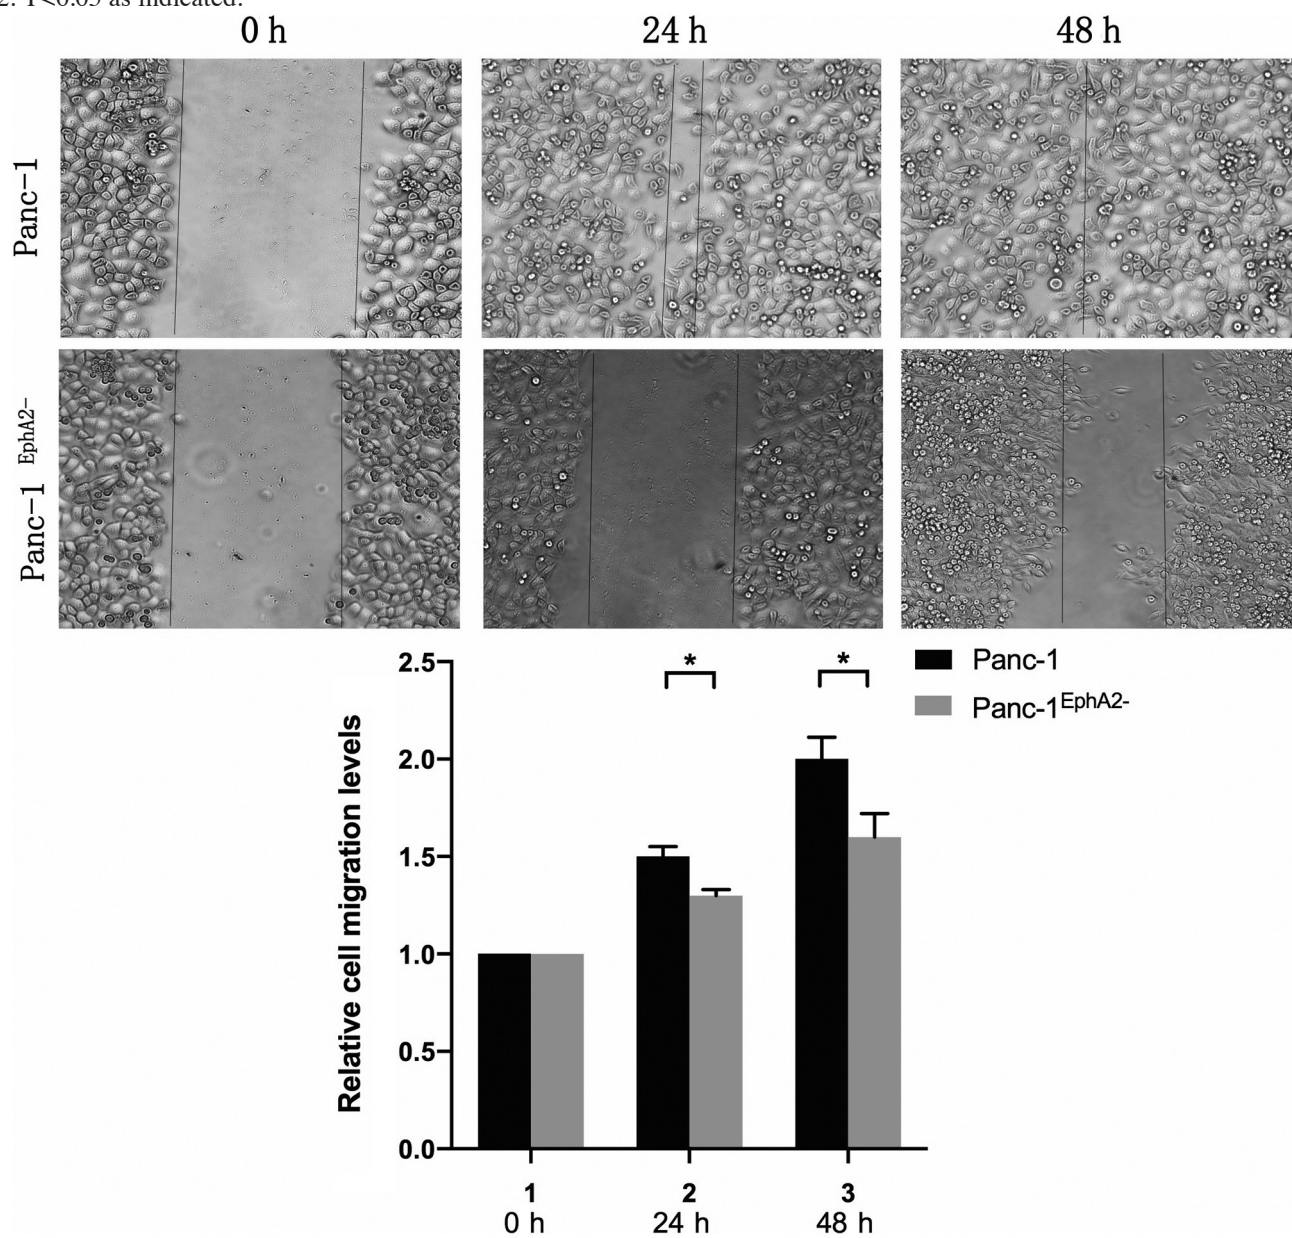



Figure S4. *In vitro* migration of BxPC-3 cells cultured with Panc1EphA2-derived EXOs and recombinant EphA2 (magnification, x200). EXO, exosome; EphA2, receptor tyrosine kinase Eph receptor A2.

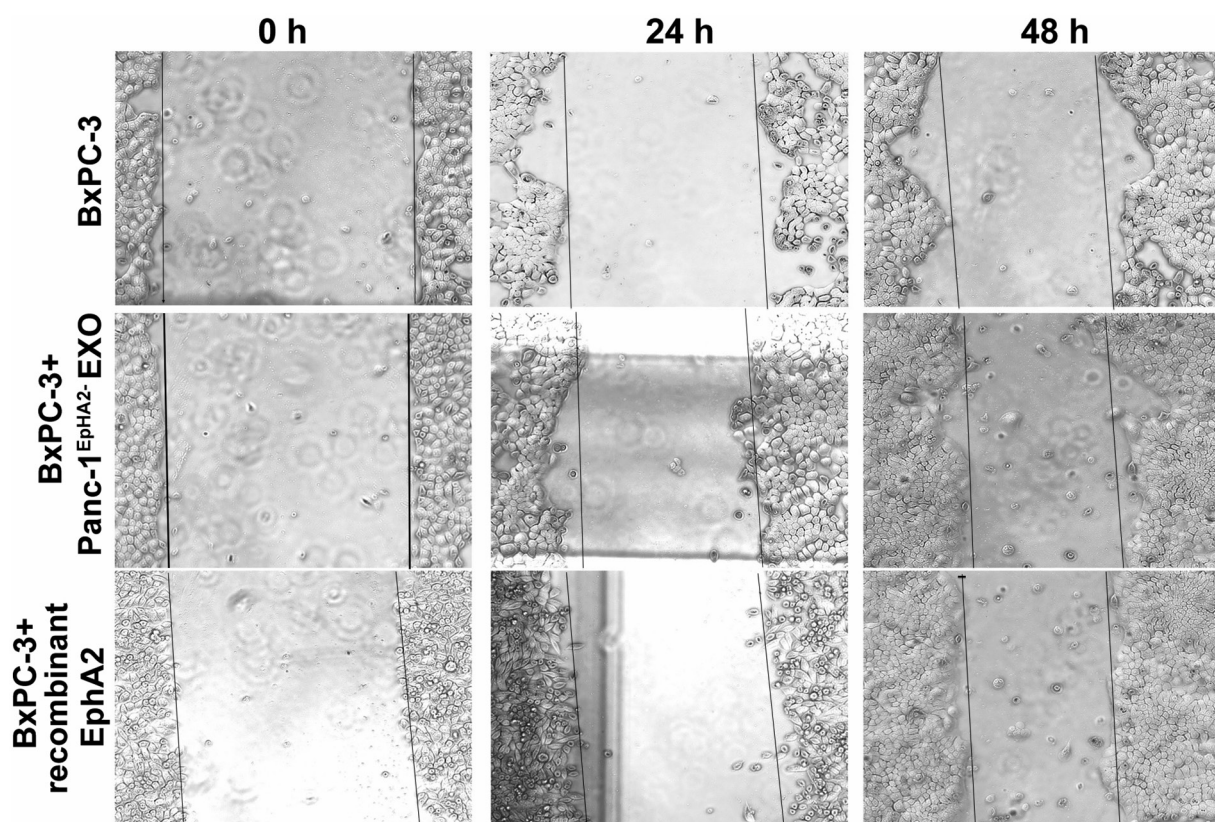

Table SI. Proteins identified by liquid chromatography-tandem mass spectrometry from the exosomal bands.

| Protein name                                      | Score | Mass, Da | Number of peptides | Identification in exosome |
|---------------------------------------------------|-------|----------|--------------------|---------------------------|
| Ephrin type-A receptor 2                          | 124   | 108,197  | 6                  | Y                         |
| MARCKS-related protein                            | 90    | 19,517   | 4                  | N                         |
| Lactadherin                                       | 70    | 43,095   | 4                  | Y                         |
| Cytochrome b-c1 complex subunit 2                 | 43    | 48,413   | 1                  | Y                         |
| Inter- $\alpha$ -trypsin inhibitor heavy chain H2 | 43    | 106,397  | 1                  | Y                         |
| Ribonuclease inhibitor                            | 40    | 49,941   | 1                  | Y                         |
| Retinoic acid-induced protein 3                   | 40    | 40,225   | 1                  | Y                         |

Y, proteins identified in exosomes that have been reported; N, proteins that have not been reported in exosomes.
